# Supplementary material for: Resident Microbiome Disruption with Antibiotics Enhances Virulence of a Colonizing Pathogen
Source: PubMed Central journal article supplement (PMC5701009; doi:10.1038/s41598-017-16393-3), 2017-11-23
Supplement: 41598_2017_16393_MOESM1_ESM.pdf [file 41598_2017_16393_MOESM1_ESM.pdf]

1 **Supplemental Material**

2

3 **TITLE:**

4 Resident Microbiome Disruption with Antibiotics Enhances Virulence of a Colonizing Pathogen

5

6 **AUTHORS:**

7 Courtney A. Thomason\*, Nathan Mullen, Lisa K. Belden, Meghan May, and Dana M. Hawley

8

9 **Summary:**

10 Extended experimental and assay methods and details associated with finch quarantine,  
11 inoculation, virulence factor assays, and 16S rRNA gene amplicon sequencing are included here.  
12 Additionally, *in vivo* and *in vitro* antibiotic sensitivity results and results of full MG × antibiotics  
13 models (MG+ and MG- groups) are described.

14

15 *Post-Capture Quarantine*

16 During quarantine, birds were captured every 3 days to assess potential clinical signs of  
17 mycoplasmal conjunctivitis. Any birds with non-zero eye scores were immediately isolated,  
18 along with their cage-mates, and were not used in the experiment. During quarantine, all birds  
19 were treated with sulfadimethoxine (starting at a high dose 0.496 mg/ml for 5 days, and dropping  
20 to low dose 0.26 mg/ml) to control intestinal coccidia infections for a minimum of 60 days post-  
21 capture, until the immune system had matured and was capable of controlling coccidia alone. To  
22 stop overgrowth of the avian gut yeast *Macrorhabdus ornithogaster*, all birds were given  
23 drinking water treated with apple cider vinegar (5mL/L) every other day during the conjunctival

24 antibiotic treatment period to acidify the gut, as well as probiotic-treated drinking water once a  
25 week designed to repopulate the healthy gut flora.

26

### 27 *Effects of Antibiotic Perturbation on Development of Mycoplasmal Conjunctivitis*

28 The MG isolate used for experimental MG inoculation, VA1994, was an expansion of the 7<sup>th</sup> *in*  
29 *vitro* passage of an isolate collected from a house finch with Mycoplasmal conjunctivitis  
30 captured in Virginia in 1994 (7994-1-7p, 2/12/09; Ley et al. 1996). Dilutions were calculated  
31 from the starting viable count of  $2.24 \times 10^7$  color changing units (CCU) per milliliter, and  
32 inoculum was maintained at -80°C until immediately before dilution.

33

34 Each vial of lyophilized cefazolin (NDC 0143-9924-90), the  $\beta$ -lactam antibiotic used in the  
35 experiment, was reconstituted with 1X sterile phosphate buffered saline to 330 mg/ml following  
36 manufacturer instructions (West-Ward Pharmaceutical Corp., Eatontown, NJ). Stock cefazolin  
37 was then diluted into Bausch & Lomb artificial tears to a concentration of 33 mg/ml. Diluted  
38 cefazolin was portioned into three aliquots per day to minimize any potential for contamination  
39 of antibiotics between treatments and stored at 4°C. This preparation of ophthalmic cefazolin  
40 was mixed fresh and discarded every 5 days.

41

### 42 *MG Virulence Factor Assays*

43 To assess sialidase enzyme activity, cell suspensions were prepared for each recovered MG  
44 isolate by collecting the bacteria by centrifugation, washing the pellets three times with 1x  
45 phosphate buffered saline (PBS), and resuspending the final cell pellet in 100  $\mu$ L PBS. Ten  $\mu$ L  
46 was removed to determine the total protein concentration of each suspension as a proxy for

47 bacterial cell number by Bradford assay, according to the manufacturer's instructions (Thermo  
48 Fisher Scientific). MG cell suspensions were then incubated for fifteen minutes with MUAN.  
49 Enzymatic activity was measured by cyan fluorescence at 450 nm, excited at 365 nm with a  
50 cutoff filter at 420 nm using a Spectramax M5 platereader. The amount of sialidase activity per  
51 mg total protein was calculated from a standard curve generated by similar incubation of Type  
52 VI *Clostridium perfringens* neuraminidase (Sigma-Aldrich) with MUAN. Enzymatic unit  
53 readings for each MG isolate were then normalized to the total protein concentration, generating  
54 sialidase measurements reported in U/mg protein.

55

56 To quantify cytoadherence, recovered MG isolates were grown to mid-log phase, collected by  
57 centrifugation, and quantitated by Bradford assay, as described above. 96-well black polystyrene  
58 plates were coated with 15% chicken erythrocyte suspension (Lampire Biologicals, Pipersville,  
59 PA) in bicarbonate buffer (pH = 9.4). Following osmotic lysis, unbound erythrocytes and  
60 liberated hemoglobin were removed by washing 3 times with 1x PBS. Coated wells were then  
61 blocked with 5% bovine serum albumin. Approximately  $10^6$  MG cells were fixed with 70%  
62 ethanol and stained with the prokaryote-specific fluorescent DNA dye SYTO9 according to the  
63 manufacturer's instructions (Molecular Probes/Thermo Fisher Scientific). Stained MG cells were  
64 allowed to bind to erythrocyte antigen for 1 hour at 37° C, after which unbound cells were  
65 removed by washing with 1x PBS. Bound MG cells were quantified by measuring green  
66 fluorescence at 498 nm excited at 485 nm with a cutoff filter at 530 nm using a Spectramax M5  
67 platereader.

68

69

70 *Statistical Analysis*

71 Because our qPCR assay is highly sensitive and subject to low levels of background  
72 contamination (Leon et al, in review), we applied a conservative threshold of infection (1349  
73 copies of pathogen; Adelman et al, 2015) to ensure results were not skewed by contamination.  
74 One bird from the MG-inoculated, *Long Antibiotics* treatment was omitted from all analyses  
75 because it was found to have pathogen load above this conservative threshold of infection one  
76 day prior to MG inoculation, and thus we could not be confident that this bird was truly naïve to  
77 MG at the time of inoculation.

78 Although some finches in the MG sham experimental groups (which never received MG  
79 in our experiments) were seropositive, indicating potential prior exposure to MG in the wild, all  
80 finches in these experimental groups were MG-negative via qPCR at the start of the experiment.  
81 Two individuals in these groups had pathogen loads well below the conservative threshold  
82 described above and in Leon and Hawley (2017), consistent with background contamination of  
83 our qPCR assay. Thus, birds in our MG sham groups did not have active *M. gallisepticum*  
84 infection despite some individuals harboring antibodies suggestive of prior exposure.

85

86 *16S rRNA gene amplicon sequencing*

87 Genomic DNA from select time-points that was used for qPCR of MG (pre-inoculation day -1  
88 and post-inoculation day 8) was also used for 16S rRNA gene amplicon sequencing of the V4  
89 region using primers 515F and barcoded 806R (Caporaso et al, 2012), and following methods  
90 outlined in Thomason et al (2017). However, overall these samples had low DNA quantity (2.13  
91 – 17.7 ng/uL DNA concentrations) relative to other samples on the same plate, with samples  
92 from antibiotic-treated birds being of particularly low quality. Doan et al. (2106) similarly found  
93 that human conjunctival microbiomes are paucibacterial compared to buccal mucosa and facial

94 skin microbiomes, with quantitative PCR indicating the presence of less than 40 bacterial cells  
95 per conjunctival swab. As a result of poor sequencing data, we did not complete a full analysis of  
96 these samples. We produced an OTU table that was rarefied at 1100 reads, and only used a  
97 subset of samples (*No Antibiotics* sham-inoculated controls on PID -1 only) to confirm that the  
98 dominant bacterial ocular community member was *Lactococcus*, as was also the case in our prior  
99 work (Thomason et al, 2017). *Lactococcus* in the present study represented  $76\% \pm 0.02$  of the  
100 relative abundance of the resident ocular microbiome prior to MG inoculation, which was very  
101 similar to our previous findings (Thomason et al, 2017).

102

### 103 *Sensitivity of the Resident Community to Antibiotic Perturbation*

104 Our prior work (Thomason et al, 2017) indicates that the dominant members of the house finch  
105 community are culturable, with *Lactococcus spp.* making up the majority of the relative  
106 abundance. Thus, we confirmed that the ocular bacterial community responded to our antibiotic  
107 perturbation using two culture-based methods. First, we examined effects of antibiotic  
108 perturbation on the culture-permissive component of the house finch conjunctiva *in vivo* using a  
109 separate set of birds, to minimize effects of depletion of the bacterial microbiome in response to  
110 repeated sampling. Because the antibiotic used can act in a bacteriostatic manner, culture-based  
111 methods allowed us to detect functional differences in the viability of the conjunctival bacterial  
112 community following antibiotic treatment. We then used *in vitro* plating methods to confirm the  
113 sensitivity of mixed ocular cultures and pure cultures of *Lactococcus spp.* isolated from house  
114 finch conjunctiva to the antibiotic, cefazolin.

115

116

117 *In Vivo Antibiotic Sensitivity Experiment*

118 To examine the sensitivity of the cultivatable ocular community members to the antibiotic we  
119 used, ocular samples were collected prior to and following antibiotic treatment (Figure 1; M\*  
120 samples) for 17 total birds (*Short Antibiotics*: n=10; *No Antibiotics Control*: n=7), 10 of which  
121 received topical antibiotic treatment as described in the Main Text, but in the absence of MG  
122 inoculation. Seventeen hatch-year house finches (7 males, 10 females) were captured between  
123 June and August 2016 in Montgomery County, VA using cage traps (under federal and state  
124 permits USFWS #MB158404-0 and VDGIF #056090) and housed under identical conditions as  
125 those described above. Notable differences in the quarantine period were treatment with 2 rounds  
126 of sulfadimethoxine treatment (0.469 mg/ml for 6 days) immediately upon capture and again 2  
127 weeks later. All birds were bled and screened for MG exposure via ELISA using an IDEXX MG  
128 Ab Test kit (IDEXX, Westbrook, Maine). All birds were single housed seven days prior to the  
129 beginning of antibiotic treatment.

130

131 The same preparation of cefazolin  $\beta$ -lactam antibiotic was used following the same treatment  
132 schedule (*Short Antibiotics* and *No Antibiotics* control) as used in the primary experiment (see  
133 Main Text).

134

135 To culture the resident ocular microbiome, conjunctivae were swabbed for 10 seconds with  
136 flocked swabs (Copan FLOQSwabs, Copan Diagnostics Inc., Murrieta, CA) pre-dipped in sterile  
137 saline. Both conjunctival swabs from a given bird were immediately combined in 3 mL brain  
138 heart infusion (BHI) medium (Thermo Fisher Scientific), vortexed, and incubated for 24 hours at  
139 37°C prior to overnight transport on cold packs to the University of New England. Upon arrival,

140 the optical density (OD) of each sample was measured ( $\lambda = 600 \text{ nm}$ ) to quantify overall bacterial  
141 growth among samples, our metric for quantification of the culture-permissive members of the  
142 ocular bacterial community.

143

144 Cultures were then streaked to obtain isolated colonies on both BHI agar (Thermo Fisher  
145 Scientific/Remel) and MRS agar (Teknova, Hollister, CA) to allow for inclusive growth and to  
146 select for lactic acid bacteria, respectively. Colonies recovered on MRS agar were positively  
147 identified as *Lactococcus* spp. by amplification and dideoxy sequencing of the 16S ribosomal  
148 RNA gene (Decker et al, 2013) or biochemical profiling using the BBL Crystal ID system for  
149 Gram positive organisms (Becton, Dickinson, and Company [BD], Franklin Lakes, NJ).

150 Colonies isolated on BHI agar were divided into “morphotypes” but not positively identified.

151 Recovered isolates were preserved in 10% dimethylsulfoxide at  $-80^{\circ}\text{C}$  for subsequent studies.

152

153 Culturable microbiome OD data were analyzed using a one-way ANOVA to compare OD values  
154 of treatment groups within sampling time points, and a paired t-test comparing OD values for  
155 swabs collected from birds before and after perturbation within the *No Antibiotics* control and  
156 *Short Antibiotics* treatment groups.

157

### 158 *In Vivo Experiment - Results*

159 Our topical antibiotic perturbation significantly reduced the abundance of culture-permissive  
160 resident bacteria, measured via the OD of culture swab growth media (post-treatment:  $F=6.00$ ,  
161  $df=1$ ,  $p=0.027$ ; Fig. S1). Although culture success appeared to decrease between sampling  
162 events, control birds that did not receive antibiotics showed no statistically significant change in

163 bacterial abundance (paired t-test:  $t = 1.24$ ,  $df = 6$ ,  $p = 0.26$ ). There were also no differences in  
164 culture success amongst the two groups of birds prior to antibiotic perturbation (pre-treatment:  
165  $F=0.01$ ,  $df=1$ ,  $p=0.91$ ), suggesting that antibiotic treatment effectively disrupted the resident  
166 bacterial ocular microbiome.

167  
168  
169  
170  
171  
172  
173  
174  
175  
176  
177  
178  
179  
180  
181  
182  
183  
184  
185  
186  
187  
188

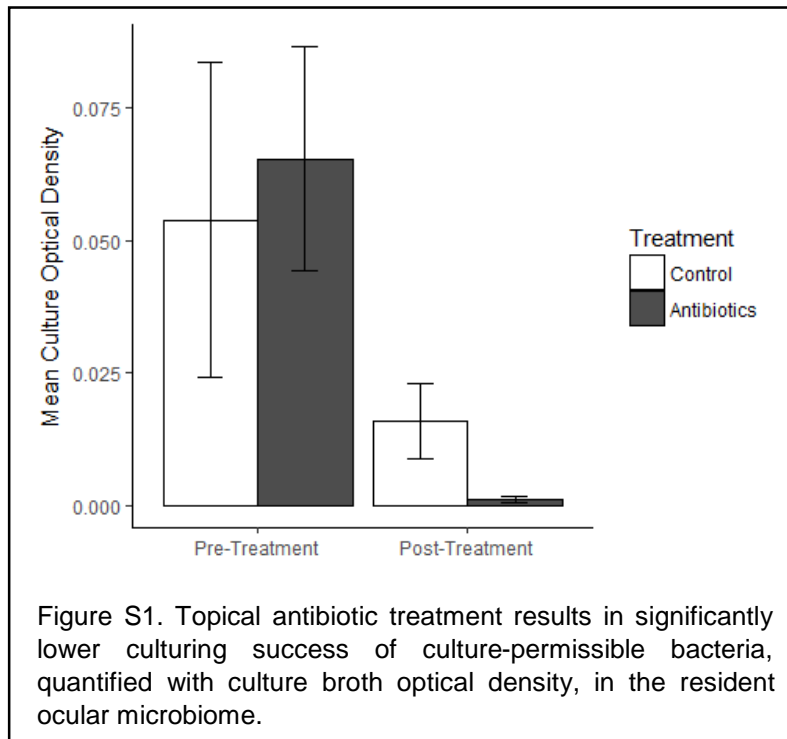

189 *In vitro Antibiotic Sensitivity of Mixed Ocular Isolates and Lactococcus Isolates*

190  
191  
192  
193  
194  
195  
196

Antibiotic susceptibility testing (AST) for cefazolin was performed on mixed cultures from birds in the *in vivo* sensitivity study (methods and result above). We used serial, two-fold broth microdilution using cation-adjusted Mueller-Hinton broth (CAMHB, Difco, BD Sparks MD). AST broth tubes were incubated at 37°C for 24 h in ambient air. Minimum inhibitory concentrations of cefazolin were measured for all mixed cultures, and they ranged from 0.5-2.5 ug/mL, all within the “susceptible” range for cefazolin.



197  
198 Because *Lactococcus* spp. make up the vast majority (~76%) of relative abundance of the  
199 resident ocular microbiome of birds in our study, we also performed *in vitro* antibiotic  
200 susceptibility testing (as described above) for all colonies identified as *Lactococcus* spp. (see  
201 above). *Lactococcus* isolates were subcultured from mixed broth cultures (1 per bird; obtained  
202 from *in vivo* experiment) onto BHI agar plates, and colonies were picked and suspended in saline  
203 to achieve a concentration equivalent to a 0.5 McFarland standard inoculum (CLSI M07-A10;  
204 January, 2015). The minimum inhibitory concentration for *Lactococcus* spp. isolates was 0.5  
205 µg/mL of cefazolin, indicating that *Lactococcus* isolated from the conjunctivae of house finches  
206 is strongly sensitive to the antibiotic used.

207

#### 208 *Effects of Cefazolin on Sialidase Activity*

209 To ensure that residual cefazolin did not influence the sialidase activity of *M. gallisepticum*  
210 isolates, we performed replicate sialidase assays (using methods described in the main text) with  
211 and without the addition of cefazolin (0.5 mg/mL in saline; 50µg per assay x 3 replicates / each).  
212 We found no effect of cefazolin on sialidase activity of *M. gallisepticum* (cefazolin added (n=3):  
213 mean±s.d. 0.0795±0.0020; No cefazolin (n=3): mean±s.d. 0.0792±0.0011; t=0.28; p=0.79).

214

#### 215 *Supplemental Results from Primary Experiment (Main Text)*

216 Here, we report the full models, including house finches that received sham inoculations of  
217 media only, that mirror the models reported in the main text.

218

219

220 *Antibiotic Treatment and Pathogen Load*

221 As expected, pathogen loads were significantly higher in birds inoculated with MG rather than  
222 media alone on all time points except the pre-inoculation time point (MG  $\times$  Post-inoculation Day  
223 (PID):  $X^2 = 35.3$ ,  $df = 5$ ,  $p < 0.001$ ; post-hoc Tukey contrasts, least-squares means:  $p < 0.04$  from  
224 PID 5 to PID 26). The effect of antibiotics on pathogen load also varied with time post-  
225 inoculation (antibiotics  $\times$  PID:  $X^2 = 45.36$ ,  $df = 10$ ,  $p < 0.001$ ). Antibiotic-disruption resulted in  
226 significantly higher pathogen loads in house finches that received antibiotic treatment at PID 5  
227 (post-hoc Tukey contrasts, least-squares means: control versus short,  $p = 0.28$ ; control versus  
228 long,  $p = 0.006$ ). There were no effects of house finch sex alone ( $X^2 = 0.04$ ,  $df = 1$ ,  $p = 0.84$ ), or  
229 in combination with antibiotic disruption ( $X^2 = 0.49$ ,  $df = 2$ ,  $p = 0.78$ ), on pathogen loads. There  
230 were no significant differences in pathogen load between short and long antibiotics treatment  
231 groups at any time point (post-hoc Tukey contrasts, least-squares means: short versus long,  $p >$   
232  $0.25$ ).

233

234 *Antibiotic Treatment and Development of Pathology*

235 Inflammation severity was significantly more severe in house finches that were inoculated with  
236 MG versus media alone, and the strength of this effect changed over the course of infection (MG  
237  $\times$  PID:  $X^2 = 167.9$ ,  $df = 7$ ,  $p < 0.001$ ). Differences in inflammation were highest between PIDs 8-  
238 19 (post-hoc Tukey contrasts, least-squares means: sham versus MG-inoculated,  $p < 0.007$ ).  
239 Antibiotic treatment resulted in significantly increased inflammation severity compared to *No*  
240 *Antibiotics* control finches, and this effect also varied with time post-inoculation (antibiotics  $\times$   
241 PID:  $X^2 = 38.3$ ,  $df = 14$ ,  $p < 0.001$ ). Finches that received antibiotics, regardless of short or long  
242 treatment, had higher composite eye scores on PIDs 12 and 15 (post-hoc Tukey contrasts, least-

243 squares means: PID 12 control versus short,  $p = 0.03$ ; PID12 control versus long,  $p = 0.07$ ; PID  
244 15 control versus short,  $p = 0.002$ ; PID15 control versus long,  $p = 0.09$ ; short versus long,  $p >$   
245  $0.08$  at all time points), compared to *No Antibiotics* control finches. House finch sex alone (sex:  
246  $X^2 = 0.31$ ,  $df = 1$ ,  $p = 0.57$ ) or in combination with antibiotic treatment (sex  $\times$  antibiotics:  $X^2 =$   
247  $0.61$ ,  $df = 2$ ,  $p = 0.73$ ) did not significantly impact development of tissue inflammation.

248

#### 249 *Antibiotic Treatment and MG Cytadherence*

250 Just as with sialidase activity, MG cytatdherence increased significantly after treatment with  
251 cefazolin, regardless of length of antibiotic treatment ( $X^2 = 12.4$ ,  $df = 2$ ,  $p < 0.001$ ). This change  
252 in cytatdherence was tightly correlated with the increase in sialidase activity ( $R=0.98$ ).

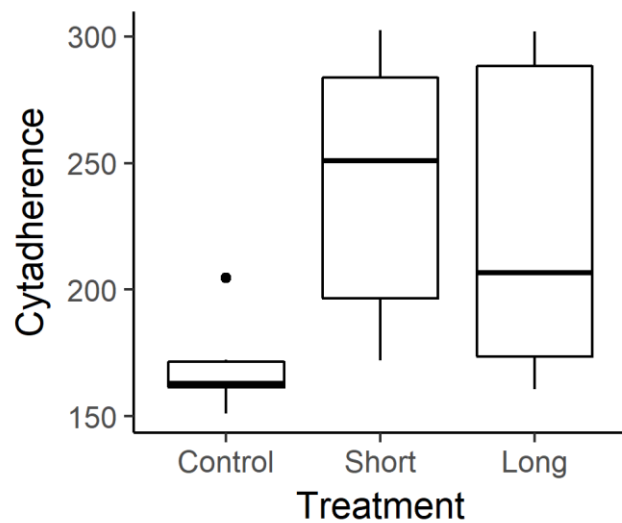

253

254 *Effects of prior  $\beta$ -lactam antibiotic perturbation on Mycoplasma gallisepticum cytatdherence.*

255

256

257

258

259

Table S1. Post hoc comparisons for MG+ inflammation score, relative inflammation, and pathogen load models on each day post-inoculation (PID). Reported values are Tukey LSMMeans  $\pm$  SE with p-values corrected for multiple comparisons in parentheses. All estimates are in reference to the first treatment group listed in each pairwise comparison. Bolded values indicate statistically significant differences.

| Response Variable           | PID | <i>No Antibiotics - Short Antibiotics</i>  | <i>No Antibiotics - Long Antibiotics</i>   | <i>Short Antibiotics - Long Antibiotics</i> |
|-----------------------------|-----|--------------------------------------------|--------------------------------------------|---------------------------------------------|
| Inflammation Score          | -1  | 0.17 $\pm$ 0.28 (0.810)                    | 0.11 $\pm$ 0.28 (0.921)                    | -0.06 $\pm$ 0.29 (0.974)                    |
|                             | 2   | 0.16 $\pm$ 0.28 (0.834)                    | 0.09 $\pm$ 0.28 (0.938)                    | -0.06 $\pm$ 0.29 (0.973)                    |
|                             | 5   | 0.16 $\pm$ 0.28 (0.834)                    | -0.08 $\pm$ 0.27 (0.954)                   | -0.24 $\pm$ 0.27 (0.657)                    |
|                             | 8   | -0.45 $\pm$ 0.23 (0.115)                   | -0.27 $\pm$ 0.23 (0.483)                   | 0.18 $\pm$ 0.21 (0.668)                     |
|                             | 12  | <b>-0.46 <math>\pm</math> 0.19 (0.047)</b> | -0.36 $\pm$ 0.19 (0.147)                   | 0.09 $\pm$ 0.18 (0.868)                     |
|                             | 15  | <b>-0.56 <math>\pm</math> 0.19 (0.009)</b> | -0.35 $\pm$ 0.19 (0.160)                   | 0.21 $\pm$ 0.18 (0.484)                     |
|                             | 26  | -0.31 $\pm$ 0.22 (0.330)                   | 0.12 $\pm$ 0.24 (0.865)                    | 0.44 $\pm$ 0.23 (0.129)                     |
| Relative Inflammation Score | -1  | 0.01 $\pm$ 0.31 (0.999)                    | -0.00 $\pm$ 0.32 (0.999)                   | -0.01 $\pm$ 0.32 (0.999)                    |
|                             | 5   | 0.06 $\pm$ 0.31 (0.981)                    | -0.10 $\pm$ 0.32 (0.948)                   | -0.16 $\pm$ 0.32 (0.875)                    |
|                             | 8   | -0.63 $\pm$ 0.31 (0.109)                   | -0.38 $\pm$ 0.32 (0.467)                   | 0.26 $\pm$ 0.32 (0.703)                     |
|                             | 12  | <b>-0.82 <math>\pm</math> 0.31 (0.027)</b> | <b>-1.08 <math>\pm</math> 0.32 (0.003)</b> | -0.26 $\pm$ 0.32 (0.697)                    |
|                             | 15  | -0.52 $\pm$ 0.31 (0.224)                   | -0.70 $\pm$ 0.32 (0.078)                   | -0.18 $\pm$ 0.32 (0.835)                    |
|                             | 26  | -0.26 $\pm$ 0.31 (0.684)                   | 0.20 $\pm$ 0.32 (0.804)                    | 0.46 $\pm$ 0.32 (0.322)                     |
| Pathogen Load               | -1  | 0.04 $\pm$ 0.42 (0.994)                    | 0.39 $\pm$ 0.52 (0.730)                    | 0.35 $\pm$ 0.53 (0.788)                     |
|                             | 5   | -0.49 $\pm$ 0.24 (0.096)                   | <b>-0.61 <math>\pm</math> 0.24 (0.028)</b> | -0.12 $\pm$ 0.22 (0.847)                    |
|                             | 8   | -0.10 $\pm$ 0.21 (0.882)                   | -0.06 $\pm$ 0.21 (0.952)                   | 0.04 $\pm$ 0.21 (0.983)                     |
|                             | 12  | -0.14 $\pm$ 0.21 (0.774)                   | 0.19 $\pm$ 0.22 (0.650)                    | 0.33 $\pm$ 0.21 (0.261)                     |
|                             | 15  | -0.37 $\pm$ 0.22 (0.211)                   | -0.05 $\pm$ 0.23 (0.973)                   | 0.32 $\pm$ 0.22 (0.320)                     |
|                             | 26  | -0.52 $\pm$ 0.29 (0.168)                   | -0.30 $\pm$ 0.30 (0.572)                   | 0.22 $\pm$ 0.26 (0.678)                     |

260

261

262

263

Table S2. Results of full host and pathogen disease response models analyzing the effects of antibiotic ocular microbiome disruption on development of Mycoplasmal conjunctivitis in house finches. Bold values indicate statistical significance following Type III Wald Chi-square tests.

| <i>Response</i>                      | <i>Predictor</i>         | $X^2$         | <i>df</i> | <i>p-value</i>    |
|--------------------------------------|--------------------------|---------------|-----------|-------------------|
| Log <sub>10</sub> MGC2 pathogen load | sex                      | 0.04          | 1         | 0.84              |
|                                      | MG × antibiotics         | 0.94          | 2         | 0.62              |
|                                      | <b>MG × PID</b>          | <b>35.31</b>  | <b>5</b>  | <b>&lt; 0.001</b> |
|                                      | <b>antibiotics × PID</b> | <b>45.36</b>  | <b>10</b> | <b>&lt; 0.001</b> |
|                                      | antibiotics × sex        | 0.49          | 2         | 0.78              |
| Inflammation Severity Score          | sex                      | 0.31          | 1         | 0.57              |
|                                      | MG × antibiotics         | 1.92          | 2         | 0.38              |
|                                      | <b>MG × PID</b>          | <b>167.92</b> | <b>7</b>  | <b>&lt; 0.001</b> |
|                                      | <b>antibiotics × PID</b> | <b>38.31</b>  | <b>14</b> | <b>&lt; 0.001</b> |
|                                      | antibiotics × sex        | 0.61          | 2         | 0.73              |

264

265

266

267

268

269

270

271

272

273

274

275

276

277

278

279 **Literature Cited**

- 280 Adelman JS, Moyers SC, Farine DR, Hawley DM. (2015). Feeder use predicts both acquisition  
281 and transmission of a contagious pathogen in a North American songbird. Proc R Soc  
282 Lond B 282:20151429.
- 283 Caporaso JG, Lauber CL, Walters WA, Berg-Lyons D, Huntley J, Fierer N, et al. (2012). Ultra-  
284 high-throughput microbial community analysis on the Illumina HiSeq and MiSeq  
285 platforms. ISME J 6:1621-1624. doi: 10.1038/ismej.2012.8.
- 286 Decker C, Olu K, Arnaud-Haond S, Duperron S. (2013). Physical proximity may promote lateral  
287 acquisition of bacterial symbionts in vesicomid clams. PloS One 8:e64830.
- 288 Doan T, Akileswaran L, Andersen D, Johnson B, Ko N, Shrestha A, et al. (2016). Paucibacterial  
289 microbiome and resident DNA virome of the healthy conjunctiva. Invest Ophthalmol Vis  
290 Sci 57:5116-5126.
- 291 Hawley DM, Grodio J, Frasca S Jr, Kirkpatrick L, Ley DH. (2011). Experimental infection of  
292 domestic canaries (*Serinus canaria domestica*) with *Mycoplasma gallisepticum*: a new  
293 model system for a wildlife disease. Avian Pathol 40:321-327.
- 294 Leon, AE and Hawley, DM. (2017). Host responses to pathogen priming in a natural songbird  
295 host. EcoHealth doi: 10.1007/s10393-017-1261-x.
- 296 Ley, D.H., Berkhoff, J.E., and McLaren, J.M. (1996). *Mycoplasma gallisepticum* isolated from  
297 house finches (*Carpodacus mexicanus*) with conjunctivitis. Avian Dis. 40: 480-483.
- 298 Pflaum, K., Tulman, E.R., Beaudet, J., Liao, X., & Geary, S.J. (2016). Global changes in  
299 *Mycoplasma gallisepticum* phase-variable lipoprotein gene *vlhA* expression during *in*  
300 *vivo* infection of the natural chicken host. Infect. Immun. **84**, 351-355.

301 Thomason CA, Leon A, Kirkpatrick LK, Belden LK, Hawley DM. (2017). Eye of the Finch:  
302 Characterization of the Ocular Microbiome of House Finches in Relation to Mycoplasma  
303 Conjunctivitis. *Environ Microbiol* 19:1439-1449.  
304
